# Supplementary material for: Characterization of Influenza A(H1N1)pdm09 Viruses Isolated in the 2018–2019 and 2019–2020 Influenza Seasons in Japan
Source: MDPI journal article supplement (doi:10.3390/v15020535), 2023-02-14
Supplement: s1 [file s1]

**Supplementary Table S1. HI titers of human sera against A(H1N1)pdm09 viruses.**

| Patient ID | Age | HI titer against:      |                      |                    |                    |                    |                    |                    |
|------------|-----|------------------------|----------------------|--------------------|--------------------|--------------------|--------------------|--------------------|
|            |     | Vaccine strain in      | 2018–2019 season     |                    |                    | 2019–2020 season   |                    |                    |
|            |     | 2017–2019 season       |                      |                    |                    |                    |                    |                    |
|            |     | Singapore <sup>a</sup> | WD039-0 <sup>b</sup> | BB251 <sup>c</sup> | BB262 <sup>d</sup> | GR156 <sup>e</sup> | GR253 <sup>f</sup> | AC109 <sup>g</sup> |
| 1          | 20  | 128                    | 256                  | 256                | 128                | 128                | 32                 | 128                |
| 2          | 22  | 256                    | 64                   | 64                 | 32                 | 32                 | 32                 | 128                |
| 3          | 23  | 256                    | 512                  | 512                | 256                | 256                | 64                 | 256                |
| 4          | 24  | 256                    | 256                  | 128                | 256                | 256                | 8                  | 16                 |
| 5          | 24  | 256                    | 256                  | 256                | 64                 | 128                | 32                 | 64                 |
| 6          | 24  | 512                    | 512                  | 256                | 256                | 256                | 64                 | 256                |
| 7          | 25  | 128                    | 256                  | 256                | 128                | 256                | 32                 | 64                 |
| 8          | 25  | 256                    | 128                  | 64                 | 16                 | 16                 | 16                 | 16                 |
| 9          | 25  | 128                    | 128                  | 128                | 128                | 128                | 16                 | 32                 |
| 10         | 25  | 256                    | 256                  | 128                | 256                | 256                | 32                 | 64                 |
| 11         | 25  | 32                     | 32                   | 64                 | 64                 | 32                 | 8                  | 32                 |
| 12         | 26  | 256                    | 128                  | 128                | 64                 | 64                 | 32                 | 64                 |
| 13         | 26  | 128                    | 64                   | 128                | 128                | 128                | 32                 | 64                 |
| 14         | 27  | 256                    | 64                   | 64                 | 32                 | 32                 | 16                 | 16                 |
| 15         | 28  | 128                    | 128                  | 128                | 64                 | 64                 | 32                 | 64                 |
| 16         | 29  | 512                    | 128                  | 128                | 64                 | 64                 | 16                 | 32                 |
| 17         | 32  | 128                    | 128                  | 128                | 64                 | 64                 | 32                 | 64                 |
| 18         | 33  | 256                    | 128                  | 128                | 128                | 128                | 16                 | 16                 |
| 19         | 33  | 128                    | 128                  | 128                | 128                | 128                | 16                 | 32                 |
| 20         | 33  | 256                    | 128                  | 128                | 64                 | 64                 | 16                 | 32                 |
| 21         | 34  | 128                    | 64                   | 128                | 64                 | 64                 | 16                 | 64                 |
| 22         | 35  | 256                    | 128                  | 128                | 128                | 64                 | 32                 | 64                 |
| 23         | 35  | 256                    | 128                  | 128                | 64                 | 64                 | 16                 | 8                  |
| 24         | 36  | 256                    | 128                  | 128                | 128                | 128                | 16                 | 8                  |
| 25         | 37  | 128                    | 128                  | 128                | 64                 | 64                 | 32                 | 64                 |
| 26         | 37  | 256                    | 128                  | 128                | 64                 | 64                 | 32                 | 64                 |
| 27         | 38  | 128                    | 128                  | 128                | 64                 | 64                 | 8                  | 32                 |
| 28         | 38  | 256                    | 128                  | 128                | 32                 | 64                 | 16                 | 64                 |
| 29         | 38  | 64                     | 64                   | 64                 | 8                  | 16                 | 8                  | 16                 |
| 30         | 38  | 256                    | 64                   | 64                 | 32                 | 32                 | 16                 | 16                 |
| 31         | 39  | 128                    | 256                  | 256                | 128                | 64                 | 32                 | 64                 |

|           |           |            |            |            |           |           |           |           |
|-----------|-----------|------------|------------|------------|-----------|-----------|-----------|-----------|
| 32        | 39        | 32         | 16         | 16         | 16        | 16        | 8         | 32        |
| 33        | 40        | 128        | 128        | 128        | 128       | 128       | 16        | 32        |
| 34        | 40        | 256        | 64         | 64         | 32        | 32        | 16        | 32        |
| 35        | 41        | 64         | 64         | 128        | 64        | 64        | 8         | 16        |
| 36        | 41        | 256        | 64         | 64         | 32        | 32        | 8         | 16        |
| 37        | 41        | 64         | 32         | 64         | 32        | 32        | 8         | 32        |
| 38        | 42        | 256        | 128        | 128        | 128       | 128       | 32        | 64        |
| 39        | 42        | 128        | 64         | 64         | 32        | 32        | 16        | 32        |
| 40        | 43        | 256        | 64         | 64         | 64        | 64        | 32        | 64        |
| 41        | 43        | 128        | 64         | 64         | 16        | 32        | 32        | 64        |
| <b>42</b> | <b>43</b> | <b>128</b> | <b>64</b>  | <b>64</b>  | <b>16</b> | <b>16</b> | <b>32</b> | <b>16</b> |
| 43        | 44        | 128        | 128        | 64         | 64        | 64        | 32        | 64        |
| 44        | 44        | 128        | 64         | 64         | 32        | 32        | 32        | 16        |
| 45        | 44        | 128        | 128        | 128        | 64        | 64        | 16        | 64        |
| 46        | 44        | 128        | 128        | 64         | 32        | 32        | 32        | 16        |
| 47        | 45        | 64         | 64         | 64         | 32        | 64        | 32        | 16        |
| 48        | 45        | 256        | 64         | 64         | 64        | 32        | 32        | 32        |
| 49        | 46        | 256        | 128        | 256        | 64        | 64        | 32        | 128       |
| <b>50</b> | <b>46</b> | <b>128</b> | <b>128</b> | <b>64</b>  | <b>16</b> | <b>16</b> | <b>16</b> | <b>32</b> |
| 51        | 47        | 64         | 32         | 32         | 32        | 32        | 8         | 16        |
| 52        | 48        | 512        | 256        | 256        | 256       | 256       | 32        | 16        |
| 53        | 49        | 128        | 128        | 128        | 64        | 64        | 16        | 64        |
| <b>54</b> | <b>51</b> | <b>256</b> | <b>128</b> | <b>128</b> | <b>32</b> | <b>32</b> | <b>16</b> | <b>16</b> |
| 55        | 52        | 128        | 64         | 64         | 128       | 128       | 16        | 32        |
| 56        | 53        | 64         | 64         | 64         | 32        | 16        | 8         | 16        |
| 57        | 53        | 128        | 128        | 128        | 64        | 64        | 64        | 64        |
| 58        | 54        | 256        | 256        | 256        | 256       | 256       | 32        | 256       |
| 59        | 55        | 128        | 128        | 256        | 128       | 128       | 32        | 128       |
| 60        | 60        | 256        | 256        | 256        | 256       | 256       | 16        | 32        |
| 61        | 61        | 128        | 128        | 64         | 64        | 64        | 32        | 64        |
| 62        | 62        | 128        | 128        | 128        | 128       | 128       | 32        | 128       |
| 63        | 76        | 128        | 64         | 64         | 32        | 32        | 16        | 32        |

<sup>a</sup>A/Singapore/GP1908/2015, <sup>b</sup>A/Tokyo/UT-WD039-0/2019, <sup>c</sup>A/Tokyo/UT-BB251/2019, <sup>d</sup>A/Tokyo/UT-BB262/2019, <sup>e</sup>A/Tokyo/UT-GR156/2019, <sup>f</sup>A/Tokyo/UT-GR253/2020, and <sup>g</sup>A/Tokyo/UT-AC109/2020 were used.

**Supplementary Table S2. Neutralization titers of human sera against A(H1N1)pdm09 viruses.**

| Patient ID | Age | Neutralization titer against:      |                      |                    |                    |                    |                    |                    |
|------------|-----|------------------------------------|----------------------|--------------------|--------------------|--------------------|--------------------|--------------------|
|            |     | Vaccine strain in 2017–2019 season | 2018–2019 season     |                    |                    | 2019–2020 season   |                    |                    |
|            |     | Singapore <sup>a</sup>             | WD039-0 <sup>b</sup> | BB251 <sup>c</sup> | BB262 <sup>d</sup> | GR156 <sup>e</sup> | GR253 <sup>f</sup> | AC109 <sup>g</sup> |
| 1          | 20  | 64                                 | 64                   | 64                 | 64                 | 32                 | 16                 | 32                 |
| 2          | 22  | 8                                  | 16                   | 16                 | <4                 | <4                 | 16                 | 32                 |
| 3          | 23  | 256                                | 256                  | 256                | 256                | 128                | 64                 | 128                |
| 4          | 24  | 16                                 | 32                   | 16                 | 32                 | 32                 | <4                 | <4                 |
| 5          | 24  | 32                                 | 64                   | 32                 | 32                 | 16                 | 8                  | 16                 |
| 6          | 24  | 128                                | 256                  | 256                | 256                | 128                | 64                 | 64                 |
| 7          | 25  | 64                                 | 128                  | 64                 | 64                 | 32                 | 32                 | 32                 |
| 8          | 25  | 16                                 | 32                   | 16                 | <4                 | <4                 | <4                 | <4                 |
| 9          | 25  | 32                                 | 64                   | 32                 | 64                 | 32                 | <4                 | 4                  |
| 10         | 25  | 32                                 | 128                  | 64                 | 64                 | 64                 | 16                 | 32                 |
| 11         | 25  | 16                                 | 16                   | 16                 | 8                  | 8                  | <4                 | 4                  |
| 12         | 26  | 16                                 | 32                   | 32                 | 16                 | 16                 | 8                  | 16                 |
| 13         | 26  | 16                                 | 64                   | 16                 | 32                 | 32                 | 8                  | 16                 |
| 14         | 27  | 8                                  | 8                    | 8                  | 4                  | 4                  | <4                 | 4                  |
| 15         | 28  | 16                                 | 32                   | 32                 | 32                 | 16                 | 8                  | 16                 |
| 16         | 29  | 8                                  | 16                   | 16                 | 16                 | 8                  | NT                 | NT                 |
| 17         | 32  | 32                                 | 64                   | 32                 | 16                 | 8                  | 8                  | 16                 |
| 18         | 33  | 16                                 | 32                   | 16                 | 64                 | 32                 | <4                 | <4                 |
| 19         | 33  | 32                                 | 64                   | 32                 | 64                 | 32                 | 4                  | 8                  |
| 20         | 33  | 16                                 | 32                   | 16                 | 16                 | 8                  | 4                  | 8                  |
| 21         | 34  | 16                                 | 32                   | 16                 | 8                  | 8                  | 4                  | 8                  |
| 22         | 35  | 8                                  | 32                   | 16                 | 8                  | 4                  | 4                  | 8                  |
| 23         | 35  | 16                                 | 32                   | 16                 | <4                 | <4                 | <4                 | <4                 |
| 24         | 36  | 16                                 | 32                   | 16                 | 32                 | 16                 | <4                 | <4                 |
| 25         | 37  | 32                                 | 32                   | 16                 | 16                 | 8                  | 4                  | 8                  |
| 26         | 37  | 16                                 | 16                   | 16                 | 16                 | 8                  | 4                  | 8                  |
| 27         | 38  | 32                                 | 64                   | 16                 | 8                  | 8                  | <4                 | 4                  |
| 28         | 38  | 16                                 | 32                   | 32                 | 4                  | <4                 | 8                  | 8                  |
| 29         | 38  | 8                                  | 32                   | 16                 | 4                  | <4                 | <4                 | 4                  |
| 30         | 38  | 8                                  | 16                   | 16                 | 4                  | 4                  | <4                 | 4                  |

|    |    |     |     |    |    |    |    |    |
|----|----|-----|-----|----|----|----|----|----|
| 31 | 39 | 128 | 128 | 64 | 16 | 4  | 16 | 32 |
| 32 | 39 | 4   | 8   | 4  | 4  | 4  | <4 | 8  |
| 33 | 40 | 16  | 32  | 32 | 32 | 32 | 4  | 4  |
| 34 | 40 | 16  | 8   | 16 | 4  | 4  | 4  | 8  |
| 35 | 41 | 32  | 32  | 16 | 4  | 8  | <4 | 4  |
| 36 | 41 | 16  | 16  | 16 | 8  | 8  | <4 | 4  |
| 37 | 41 | 8   | 8   | 8  | 8  | 8  | 4  | 4  |
| 38 | 42 | 64  | 64  | 64 | 64 | 32 | 32 | 16 |
| 39 | 42 | 16  | 16  | 16 | 8  | 8  | <4 | 4  |
| 40 | 43 | 16  | 32  | 16 | 8  | 4  | 8  | 16 |
| 41 | 43 | 32  | 32  | 16 | <4 | <4 | 16 | 8  |
| 42 | 43 | 8   | 8   | 4  | <4 | <4 | <4 | <4 |
| 43 | 44 | 32  | 32  | 16 | 32 | 16 | 8  | 8  |
| 44 | 44 | 16  | 32  | 16 | 4  | 4  | <4 | <4 |
| 45 | 44 | 8   | 8   | 8  | 16 | 8  | <4 | <4 |
| 46 | 44 | 16  | 8   | 16 | 8  | 4  | <4 | 4  |
| 47 | 45 | 8   | 8   | 16 | 8  | 4  | <4 | <4 |
| 48 | 45 | 8   | 8   | 8  | 8  | 4  | 4  | 4  |
| 49 | 46 | 32  | 32  | 32 | 8  | 4  | 8  | 16 |
| 50 | 46 | 16  | 32  | 16 | <4 | <4 | 8  | 16 |
| 51 | 47 | 8   | 8   | 8  | 8  | 8  | 4  | 4  |
| 52 | 48 | 32  | 64  | 32 | 32 | 32 | NT | NT |
| 53 | 49 | 16  | 64  | 32 | 32 | 16 | 8  | 16 |
| 54 | 51 | 16  | 8   | 16 | 4  | <4 | <4 | <4 |
| 55 | 52 | 16  | 16  | 16 | 32 | 32 | <4 | 4  |
| 56 | 53 | 16  | 16  | 16 | 4  | 4  | 4  | 8  |
| 57 | 53 | 32  | 32  | 16 | 16 | 8  | 4  | 8  |
| 58 | 54 | 64  | 64  | 64 | 64 | 64 | 32 | 64 |
| 59 | 55 | 32  | 64  | 64 | 64 | 32 | 16 | 32 |
| 60 | 60 | 16  | 8   | 4  | 32 | 8  | 4  | 8  |
| 61 | 61 | 32  | 32  | 32 | 32 | 16 | 4  | 8  |
| 62 | 62 | 32  | 32  | 16 | 32 | 32 | 16 | 64 |
| 63 | 76 | 32  | 8   | 8  | 4  | <4 | NT | NT |

<sup>a</sup>A/Singapore/GP1908/2015, <sup>b</sup>A/Tokyo/UT-WD039-0/2019, <sup>c</sup>A/Tokyo/UT-BB251/2019, <sup>d</sup>A/Tokyo/UT-BB262/2019, <sup>e</sup>A/Tokyo/UT-GR156/2019, <sup>f</sup>A/Tokyo/UT-GR253/2020, and <sup>g</sup>A/Tokyo/UT-AC109/2020 were used. NT, not tested.
